# Supplementary material
Source: ML conference proceedings conference paper supplement (https://openaccess.thecvf.com/content/CVPR2021/html/Lv_Learning_Semantic_Person_CVPR_2021_paper.html)
Supplement: Supplementary file 1 [file Lv_Learning_Semantic_Person_CVPR_2021_supplemental.pdf]

# Learning Semantic Person Image Generation by Region-Adaptive Normalization (Supplementary Material)

Zhengyao Lv<sup>1</sup>, Xiaoming Li<sup>1</sup>, Xin Li<sup>2</sup>, Fu Li<sup>2</sup>, Tianwei Lin<sup>2</sup>, Dongliang He<sup>2</sup>, Wangmeng Zuo<sup>1,3</sup>✉

<sup>1</sup>School of Computer Science and Technology, Harbin Institute of Technology, China

<sup>2</sup>Department of Computer Vision Technology (VIS), Baidu Inc.

<sup>3</sup>Pazhou Lab, Guangzhou, China

cszy98@gmail.com {csxmli, wmzuo}@hit.edu.cn

## A. Training procedures

In order to explore the training manners of the two-stage model that may bring benefits to the final results, in this supplemental material, we conduct three schemes, (i)  $S_1 \triangleright S_2$ : pre-training the SPATN model in stage one, then fixing its parameters and training SPGNet in stage two; (ii)  $S_1 \bowtie S_2$ : pre-training the SPATN model in stage one, then jointly training with the SPGNet in stage two; (iii)  $S_1 \parallel S_2$ : training the SPATN and SPGNet simultaneously, in which the SPGNet takes the ground-truth target parsing map  $S_{p_t}$  as input. During the inference, the model takes the predicted target parsing map  $\hat{S}_{p_t}$  from the SPATN model as input to generate the final results. The comparison results are shown in Table A. We find that though the joint training manner ( $S_1 \bowtie S_2$ ) usually obtains great performance in many fields, it shows inferior results in this task. We analyze that 1) due to the long pathway of SPGNet, the gradient from the  $\mathcal{L}_{full}$  to update the SPATN model tends to be zero, making the SPATN model seldomly benefits from the end-to-end training, 2) more importantly, there is a gap between the predicted semantic parsing map and the ground-truth. The inaccurate prediction may confuse the learning of the SPGNet, thus has a negative impact on the generation process. Therefore, we adopt the  $S_1 \parallel S_2$  scheme to train our two-stage model and use the predicted target semantic maps in the first stage to guide the final generation of the target image in the inference.

| Scheme                   | SSIM $\uparrow$ | FID $\downarrow$ | PCKh $\uparrow$ | LPIPS $\downarrow$ |
|--------------------------|-----------------|------------------|-----------------|--------------------|
| $S_1 \triangleright S_2$ | 0.785           | 17.340           | 0.96            | 0.2240             |
| $S_1 \bowtie S_2$        | <b>0.792</b>    | 24.309           | 0.96            | 0.2435             |
| $S_1 \parallel S_2$      | 0.782           | <b>12.243</b>    | <b>0.97</b>     | <b>0.2105</b>      |

Table A. The quantitative comparison of different training schemes on our DeepFashion test set.  $\uparrow$  ( $\downarrow$ ) means higher (lower) is better.

## B. Network Architecture of SPGNet

Our SPGNet consists of a pose encoder, an appearance encoder and a decoder which is composed of several SPG-Blocks. Table B shows the details of SPGNet. Table C and Table D give the detailed network architecture of SPG-Block and Feature Deformation Module, respectively. Conv. ( $d, k, s$ ) and ConvT. ( $d, k, s$ ) denote convolution and transposed convolution layer, where  $d$ ,  $k$  and  $s$  are output dimension, convolution kernel size and stride, respectively. And  $\dim(f_{t-1})$  is the dimension of feature map  $f_{t-1}$ . LReLU is leaky ReLU with negative slope  $c$ . BN and IN represent batch normalization and instance normalization, respectively.

The denotation of input is the same as that in the paper.  $I_{p_s}$  denotes the source appearance image.  $S_{p_s}$  and  $\hat{S}_{p_t}$  are source semantic parsing map and predicted target semantic parsing map.  $p$  is keypoint heat map of the target pose.  $\Phi_{2D}$  and  $V$  denote the projection of the predicted 3D flow and visibility map from Intr-Flow [1], respectively.

## C. Distance Map

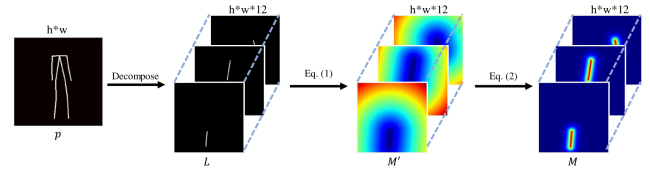

Figure A. The details of the distance map generation.

It may be not enough to use only keypoints skeleton as pose representations to generate semantic maps, especially when the poses are complex or rare in the dataset. The introduction of distance maps makes pose representation more robust to various poses. We generate 12 lines  $\{L_m\}_{m=1}^{12}$  distance map with 18-channels keypoint heat maps to represent the body skeleton. Each skeleton generates one channel distance map, thus we can generate a 12-channels distance map  $\{M_m\}_{m=1}^{12}$ , which has the same width and height of the source image. The values in  $(x, y)$  of each  $M_m$  is calculated by the smallest distance between the point  $(x, y)$  and the skeleton  $L_m$ . The  $m$ -th distance map can be obtained by:

$$M'_m(x, y) = \min_{(x', y') \in L_m} \{\sqrt{(x - x')^2 + (y - y')^2}\}, \quad (1)$$

where  $(x', y')$  denotes the point on the skeleton  $L_m$ . Here, we further normalize these values by introducing a negative parameter  $\kappa$ . The final distance map is then defined as:

$$M_m(x, y) = \exp(\kappa * M'_m(x, y)), \quad (2)$$

where  $m \in \{1, 2, 3 \dots 12\}$  represents the  $m$ -th skeleton. In this way, the closer the point to the skeleton, the larger the value is. Thus it can well model the body structure. The process of distance map generation is shown in Fig. A. The experimental results on DeepFashion show that without using the distance map, the mIOU of the predicted semantic maps is 0.520, while when using the distance map, the mIOU is 0.539. By using the distance map, our method can generate plausible semantic parsing maps even though the poses are

| Input              | $I_{p_s} (3 \times 256 \times 256)$<br>$\Phi_{2D} (2 \times 256 \times 256)$<br>$V (1 \times 256 \times 256)$                                                                                                                                                                                                                                                                                                                                                                                                                                                                                                         | $p$<br>( $18 \times 256 \times 256$ )                                                                                                                                                                                                                                                                                                                                                                                                                                                                                                                                                                  | $I_{p_s}, (3 \times 256 \times 256)$<br>$S_{p_s}, \hat{S}_{p_t}, (20 \times 256 \times 256)$                                                                                                                                           |
|--------------------|-----------------------------------------------------------------------------------------------------------------------------------------------------------------------------------------------------------------------------------------------------------------------------------------------------------------------------------------------------------------------------------------------------------------------------------------------------------------------------------------------------------------------------------------------------------------------------------------------------------------------|--------------------------------------------------------------------------------------------------------------------------------------------------------------------------------------------------------------------------------------------------------------------------------------------------------------------------------------------------------------------------------------------------------------------------------------------------------------------------------------------------------------------------------------------------------------------------------------------------------|----------------------------------------------------------------------------------------------------------------------------------------------------------------------------------------------------------------------------------------|
| Feature Extraction | Conv. (32, 1, 1)<br>ResidualBlock, ResidualBlock, FeatureWarp<br>ReLU, Conv. (64, 3, 2), BN<br>ResidualBlock, ResidualBlock, FeatureWarp<br>ReLU, Conv. (128, 3, 2), BN<br>ResidualBlock, ResidualBlock<br>ReLU, Conv. (128, 3, 2), BN<br>ResidualBlock, ResidualBlock<br>ReLU, Conv. (128, 3, 2), BN | Conv. (32, 1, 1)<br>ResidualBlock, ResidualBlock<br>ReLU, Conv. (64, 3, 2), BN<br>ResidualBlock, ResidualBlock<br>ReLU, Conv. (128, 3, 2), BN | Conv. (32, 3, 1), IN, LReLU(0.2)<br>Conv. (64, 3, 2), IN, LReLU(0.2)<br>Conv. (128, 3, 2), IN, LReLU(0.2)<br>ConvT.(64, 3, 2), IN, LReLU(0.2)<br>ConvT.(32, 3, 2), IN, LReLU(0.2)<br>ConvT.(128, 3, 1), Tanh<br>Region Average Pooling |
| output             | warped appearance features $f_a^w$                                                                                                                                                                                                                                                                                                                                                                                                                                                                                                                                                                                    | pose features $f_p$                                                                                                                                                                                                                                                                                                                                                                                                                                                                                                                                                                                    | Style Codes $ST$                                                                                                                                                                                                                       |
| Feature Fusion     | ReLU, Conv. (512, 3, 1) PixelShuffle(2), SPGBlock 1<br>ReLU, Conv. (512, 3, 1) PixelShuffle(2), SPGBlock 2<br>ReLU, Conv. (512, 3, 1) PixelShuffle(2), SPGBlock 3<br>ReLU, Conv. (512, 3, 1) PixelShuffle(2), SPGBlock 4<br>ReLU, Conv. (384, 3, 1) PixelShuffle(2), SPGBlock 5<br>ReLU, Conv. (256, 3, 1) PixelShuffle(2), SPGBlock 6<br>ReLU, Conv. (128, 3, 1) PixelShuffle(2), SPGBlock 7<br>Conv. (3, 7, 1)<br>Tanh()                                                                                                                                                                                            |                                                                                                                                                                                                                                                                                                                                                                                                                                                                                                                                                                                                        |                                                                                                                                                                                                                                        |
| output             | $\hat{I}_{p_t}$<br>( $3 \times 256 \times 256$ )                                                                                                                                                                                                                                                                                                                                                                                                                                                                                                                                                                      |                                                                                                                                                                                                                                                                                                                                                                                                                                                                                                                                                                                                        |                                                                                                                                                                                                                                        |

Table B. Details of SPGNet Architecture.

| Input    | $f_{t-1}$                       | $f_a^w$                                       | $f_p$ | $ST$         | $\hat{S}_{p_t}$ |
|----------|---------------------------------|-----------------------------------------------|-------|--------------|-----------------|
| SPGBlock | $f_{t-1}$                       | Concat                                        |       | broadcasting |                 |
|          | $f_{t-1}$                       | SEAN, ReLU<br>Conv. ( $\dim(f_{t-1}), 1, 1$ ) |       |              |                 |
|          | Concat                          |                                               |       |              |                 |
|          | SEAN, ReLU                      |                                               |       |              |                 |
|          | Conv. ( $\dim(f_{t-1}), 3, 1$ ) |                                               |       |              |                 |
|          | $+f_{t-1}$                      |                                               |       |              |                 |
| output   | $f_t$                           |                                               |       |              |                 |

Table C. Details of SPGBlock.

| Input               | $f_a$                                                            | $\Phi_{2D}$ | $V$            |
|---------------------|------------------------------------------------------------------|-------------|----------------|
| Feature Deformation | Warp                                                             |             | $V$            |
|                     | Expand Feature<br>$f_a^{w'} * (V == 1)$<br>$f_a^{w'} * (V == 0)$ |             |                |
|                     | Visible part                                                     |             | Invisible part |
|                     | Concat                                                           |             |                |
|                     | ResidualBlock                                                    |             |                |
| output              | $f_a^w$                                                          |             |                |

Table D. Details of Feature Deformation Module.

complex or rare (*e.g.*, crossed hand in Figure B), which will further benefit the later target image generation.

## D. More Qualitative Results

In this section, we show more visual comparison with the competing methods (*i.e.* PATN [5], Intr-Flow [1], GFLA [3], XingGAN [4], ADGAN [2]) on DeepFashion and Market-1501 in Figs. C and D, respectively. It can be seen that our method can generate more semantic, consistent, and photo-realistic results. Besides, we also show more visual comparison of different SPGNet variants in Fig. E.

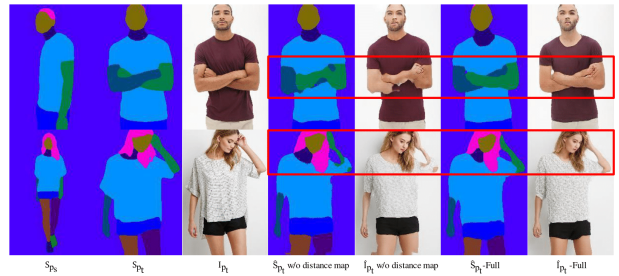

Figure B. The gain of the distance map to the image generation.



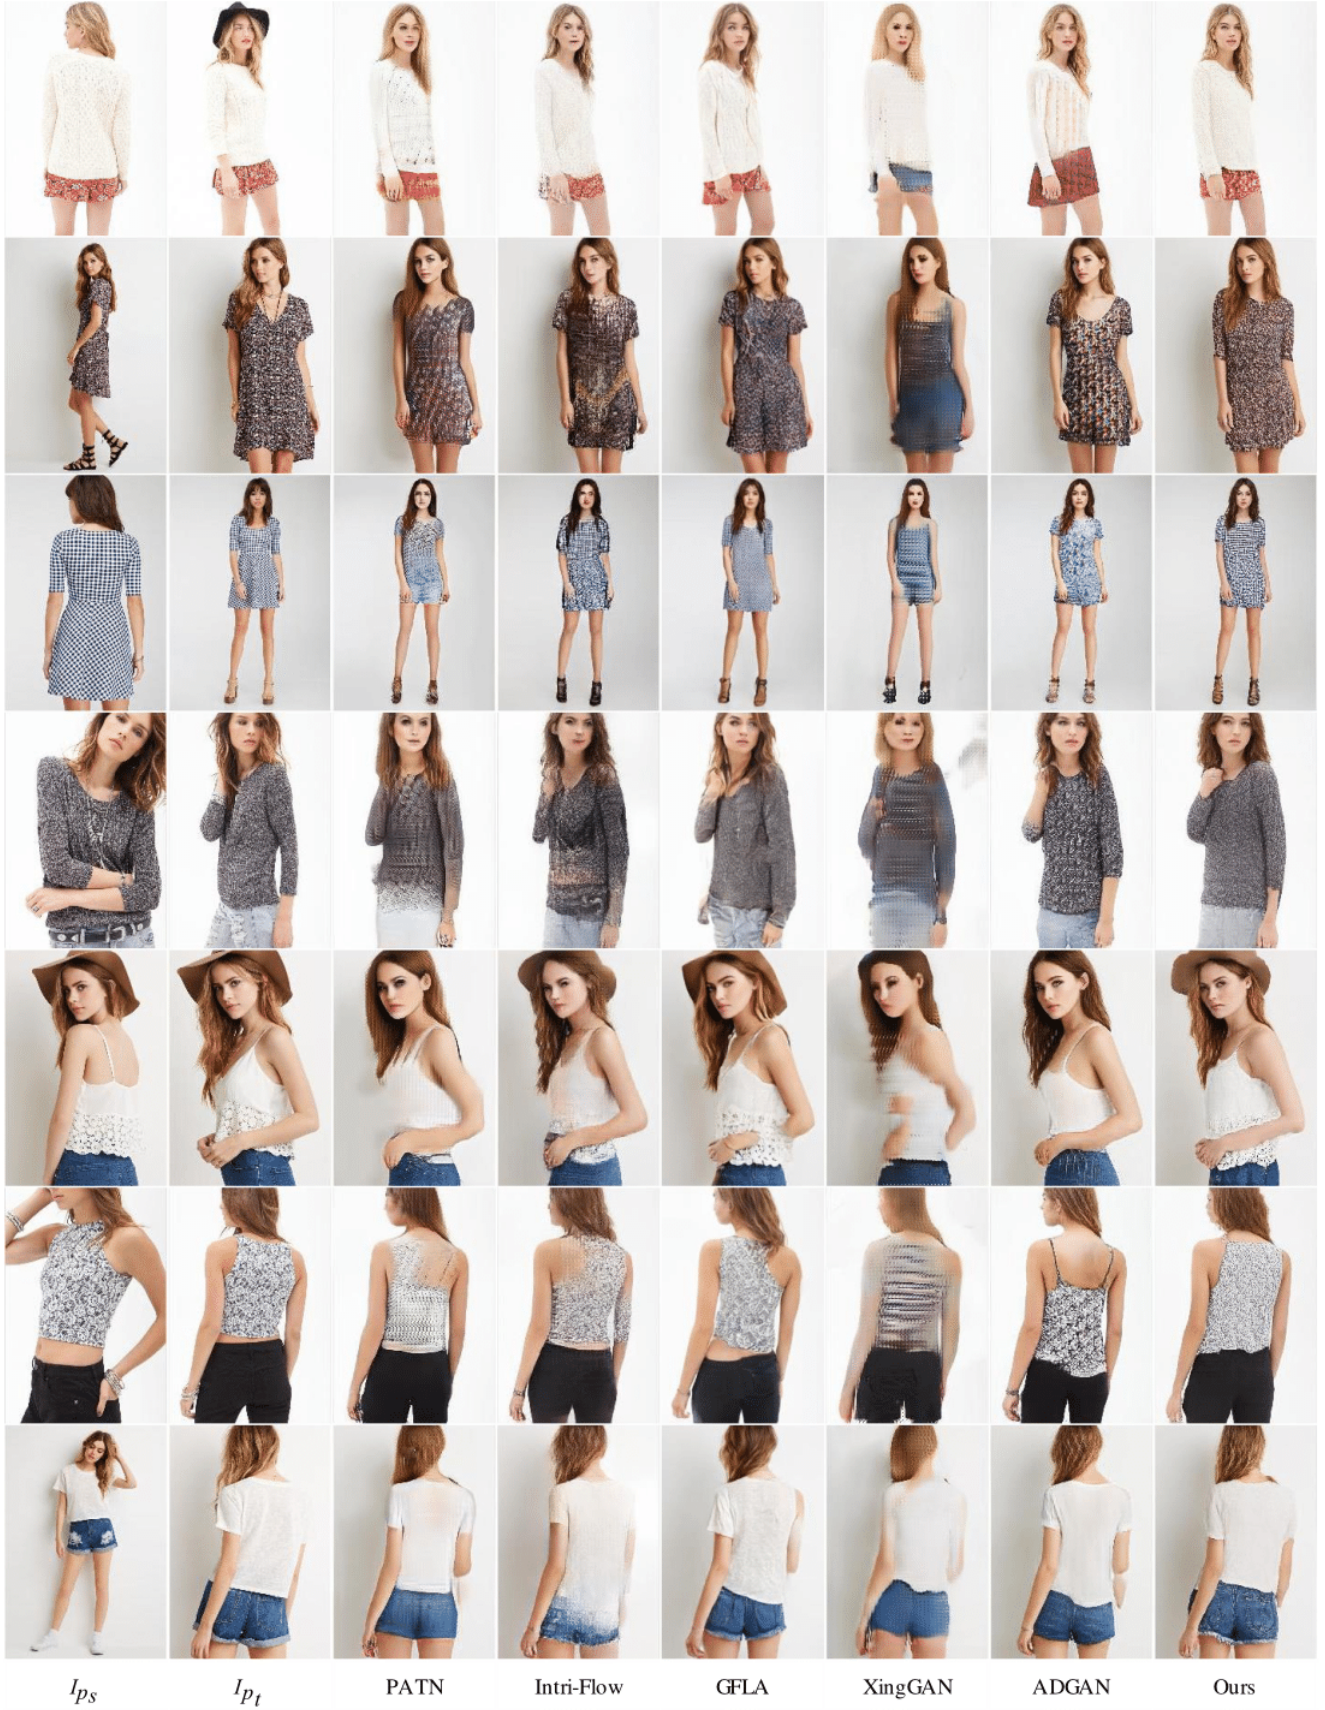

Figure C. More visual comparison with the competing methods on DeepFashion.



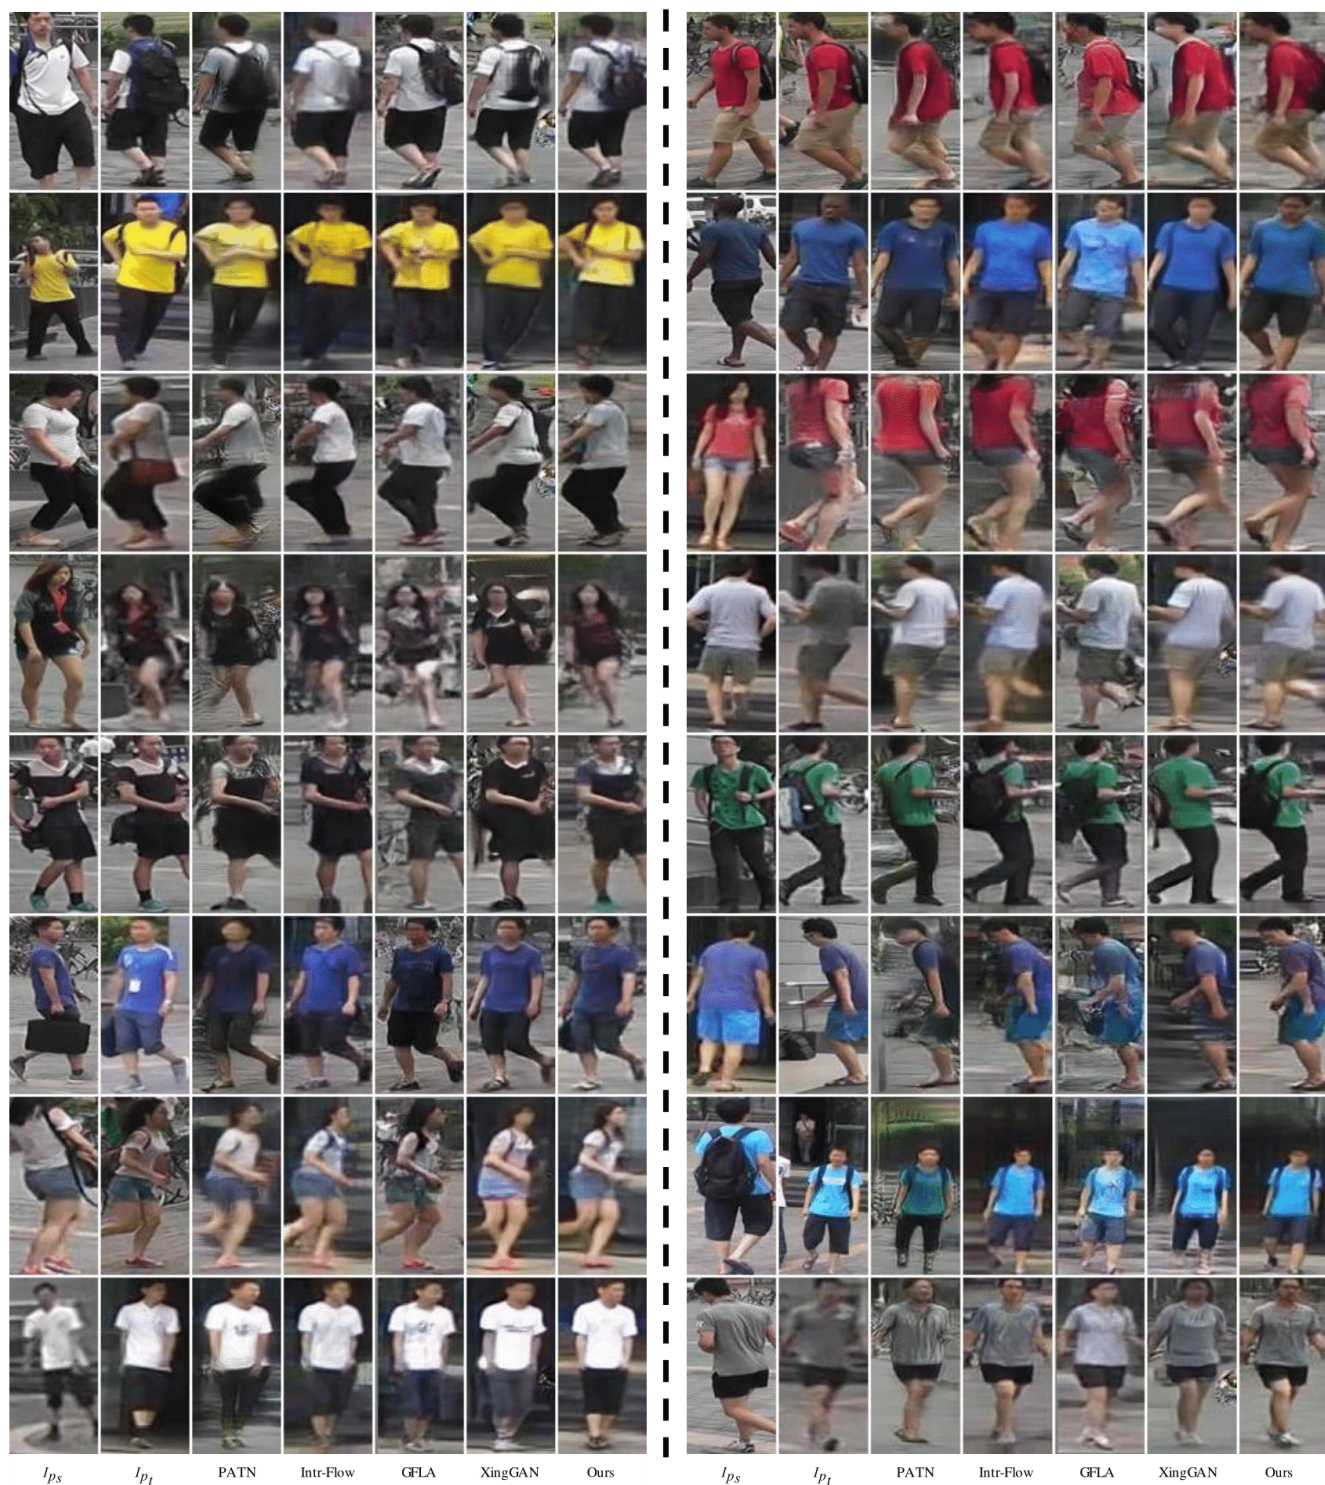

Figure D. More visual comparison with the competing methods on Market-1501.



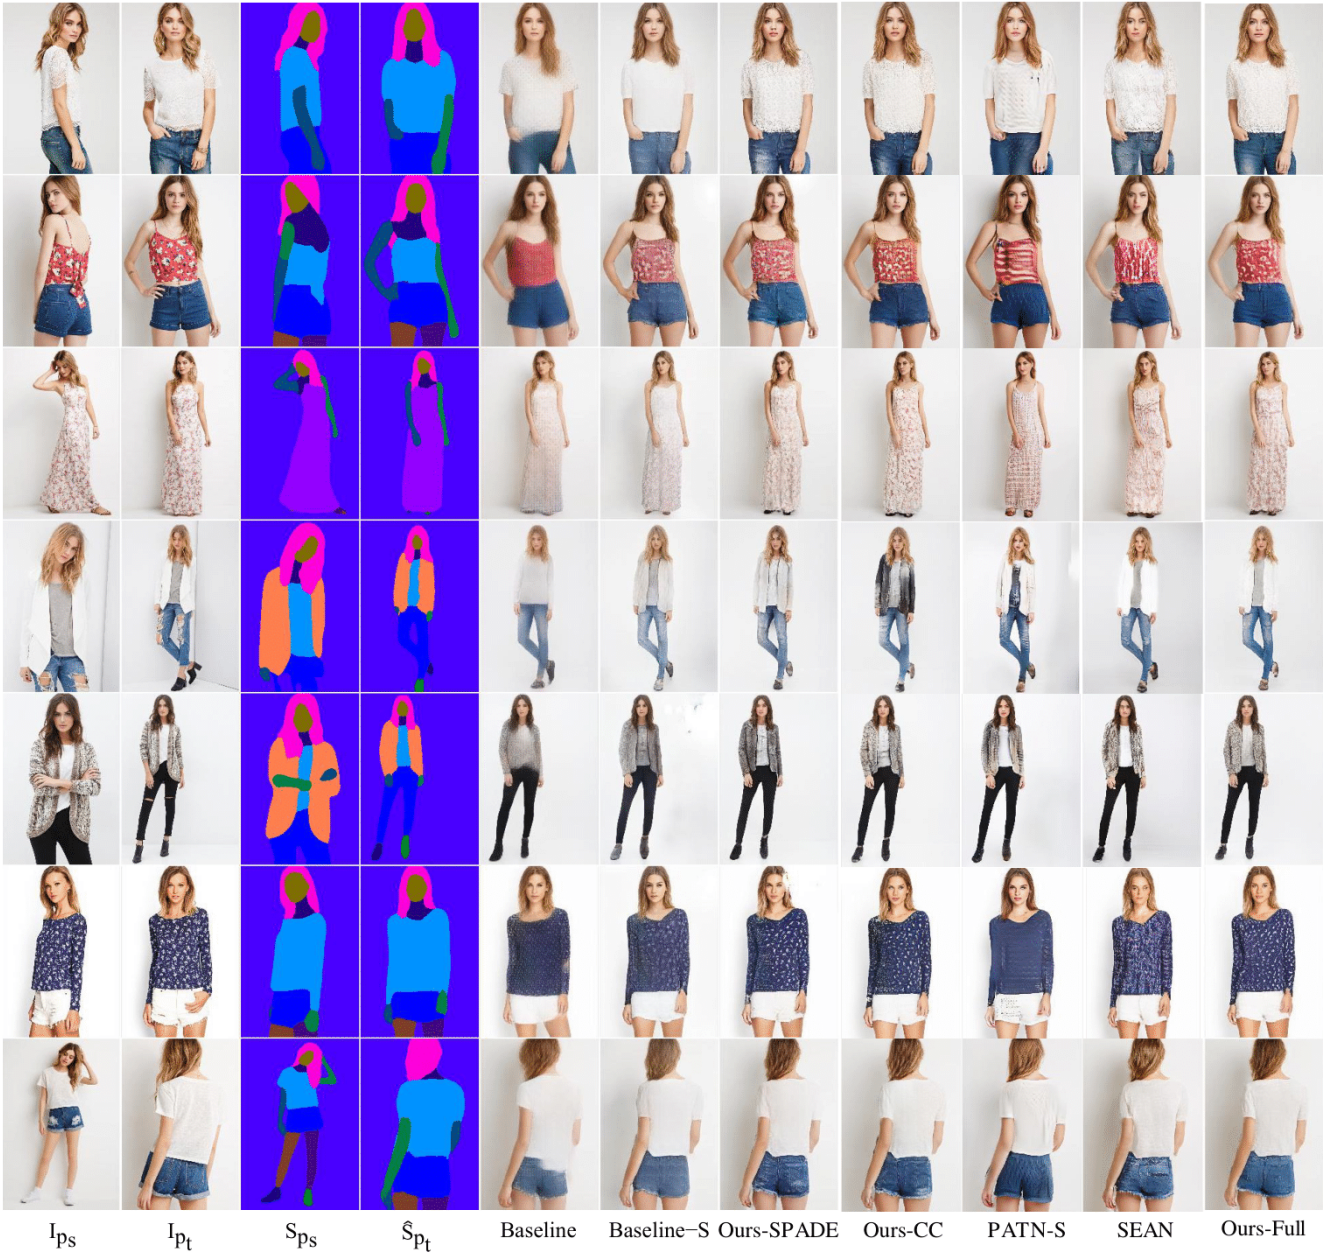

Figure E. More visual comparison of different SPGNet variants.

## References

- [1] Yining Li, Chen Huang, and Chen Change Loy. Dense intrinsic appearance flow for human pose transfer. In *Proceedings of the IEEE Conference on Computer Vision and Pattern Recognition*, pages 3693–3702, 2019. 1, 2
- [2] Yifang Men, Yiming Mao, Yuning Jiang, Wei-Ying Ma, and Zhouhui Lian. Controllable person image synthesis with attribute-decomposed gan. In *Proceedings of the IEEE Conference on Computer Vision and Pattern Recognition*, 2020. 2
- [3] Yurui Ren, Xiaoming Yu, Junming Chen, Thomas H Li, and Ge Li. Deep image spatial transformation for person image generation. In *Proceedings of the IEEE Conference on Computer Vision and Pattern Recognition*, pages 7690–7699, 2020. 2
- [4] Hao Tang, Song Bai, Li Zhang, Philip HS Torr, and Nicu Sebe. Xinggan for person image generation. *arXiv preprint arXiv:2007.09278*, 2020. 2
- [5] Zhen Zhu, Tengpeng Huang, Baoguang Shi, Miao Yu, Bofei Wang, and Xiang Bai. Progressive pose attention transfer for person image generation. In *Proceedings of the IEEE Conference on Computer Vision and Pattern Recognition*, pages 2347–2356, 2019. 2
